# Supplementary material for: Recent glacier and lake changes in High Mountain Asia and their relation to precipitation changes
Source: Copernicus journal article supplement (doi:10.5194/tc-13-2977-2019), 2019-11-13
Supplement: Supplementary file [file tc-13-2977-2019-supplement-title-page.pdf › tc-13-2977-2019-supplement-title-page.pdf]

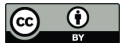

## *Supplement of*

# **Recent glacier and lake changes in High Mountain Asia and their relation to precipitation changes**

**Désirée Treichler et al.**

*Correspondence to:* Désirée Treichler ([desiree.treichler@geo.uio.no](mailto:desiree.treichler@geo.uio.no))

- tc-13-2977-2019-supplement-title-page.pdf
- data\_supplement
  - METADATA\_tc-2018-238\_datasupplement.txt
  - tc-2018-238\_datasupplement.cpg
  - tc-2018-238\_datasupplement.dbf
  - tc-2018-238\_datasupplement.prj
  - tc-2018-238\_datasupplement.sbn
  - tc-2018-238\_datasupplement.sbx
  - tc-2018-238\_datasupplement.shp
  - tc-2018-238\_datasupplement.shp.xml
  - tc-2018-238\_datasupplement.shx
- tc-2018-238-supplement.pdf

The copyright of individual parts of the supplement might differ from the CC BY 4.0 License.
